# Supplementary material for: Aloe Vera-Fermented Beverage Ameliorates Obesity and Gut Dysbiosis in High-Fat-Diet Mice
Source: MDPI journal article supplement (doi:10.3390/foods11223728), 2022-11-20
Supplement: s1 [file s1]

Table S1. The compositions of two kinds of beverages.

| Chemical substances           | PFB        | AFB          |
|-------------------------------|------------|--------------|
| Total polyphenols (mg/mL)     | 7.57±0.28  | 91.23±2.69   |
| Total protein (mg/mL)         | 0.27±0.02  | 0.19±0.00    |
| Total flavonoids (mg/mL)      | 0.11±0.02  | 0.24±0.02    |
| Total sugars (mg/mL)          | 64.07±3.96 | 444.86±13.99 |
| Total reducing sugars (mg/mL) | 6.9±0.06   | 181.82±3.96  |

Table S2. The contents of different ingredients in different diet (% of diet, *w/w*).

| Ingredients           | ND (%) | HFD (%) |
|-----------------------|--------|---------|
| corn                  | 0.48   | -       |
| wheat middlings       | 0.12   | -       |
| wheat                 | 0.17   | -       |
| Soybean meal          | 0.07   | -       |
| Peruvian Fish Meal    | 0.04   | -       |
| American Chicken Meal | 0.05   | -       |
| animal premix         | 0.04   | -       |
| Stone powder          | 0.01   | -       |
| Soybean oil           | 0.01   | -       |
| Normal diet           | -      | 0.40    |
| Lard                  | -      | 0.28    |
| Sucrose               | -      | 0.1     |
| Whole milk power      | -      | 0.08    |
| Casein                | -      | 0.02    |
| Calcium bicarbonate   | -      | 0.02    |

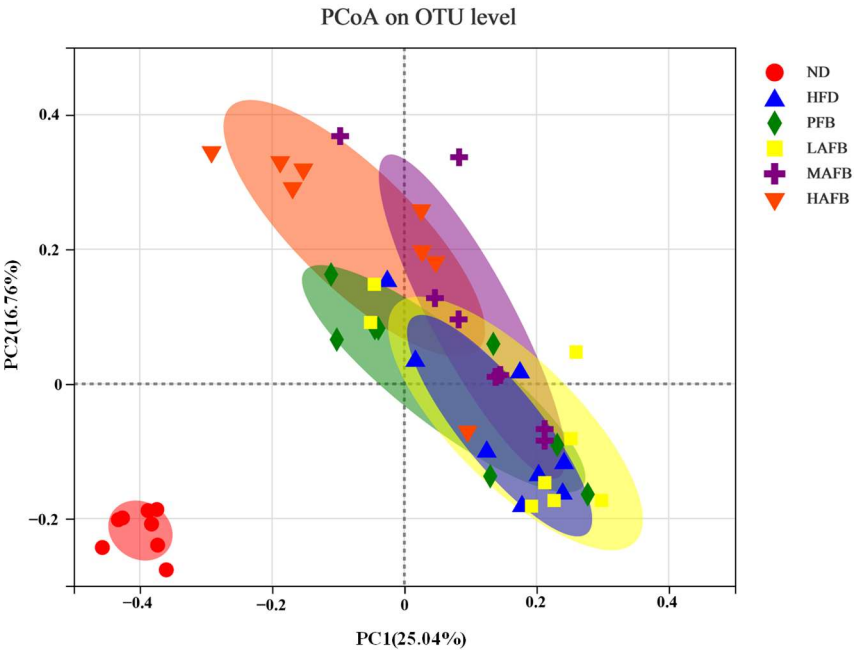

Figure S1. UniFrac distance-based principal coordinate analysis (PCoA) of all 6 groups.
